# Supplementary material for: Post-competition recovery strategies in elite male soccer players. Effects on performance: A systematic review and meta-analysis
Source: PubMed Central journal article supplement (PMC7531804; doi:10.1371/journal.pone.0240135), 2020-10-02
Supplement: pone.0240135.s003.pdf [file pone.0240135.s003.pdf]

### III-Data extraction form for randomised controlled trials

|                  |              |                      |
|------------------|--------------|----------------------|
| <b>Reviewer:</b> | <b>Date:</b> | <b>Study number:</b> |
|------------------|--------------|----------------------|

#### GENERAL STUDY INFORMATION

**First author (e.g. Smith F):**

**Correspondence to:**  not provided

**Title:**

**Journal:**

**Year of publication:**                      **Vol.:**                      **Num.:**                      **Pages:**

**Country:**                                              **Language:**

**Sources of support:**

#### STUDY DESIGN

- Randomised Controlled Trial
- Cluster Randomised Controlled Trial

**Details:**

**Setting:**  Unicenter     Multicenter ( National /  International)                       Detail not provided

**Recruitment period (months):**                       Detail not provided

#### STUDY POPULATION AND PARTICIPANTS

**Study population description:**

**Inclusion criteria:**

**Exclusion criteria:**

| <i>Flow of participants</i>                                   |                                          |                        |
|---------------------------------------------------------------|------------------------------------------|------------------------|
|                                                               | <b>Groups<br/>Intervention / Control</b> | <b>Reasons/Details</b> |
| <b>Invited to participate and/or screened for eligibility</b> |                                          |                        |
| <b>Declined to participate</b>                                |                                          |                        |
| <b>Excluded</b>                                               |                                          |                        |
| <b>Randomized</b>                                             |                                          |                        |
| <b>Dropouts</b>                                               |                                          |                        |
| <b>Completed</b>                                              |                                          |                        |
| <b>Analysed</b>                                               |                                          |                        |

| <i>Baseline characteristics</i> |                            |                                  |                             |                                                                 |
|---------------------------------|----------------------------|----------------------------------|-----------------------------|-----------------------------------------------------------------|
|                                 | <b>Total:<br/>(n=    )</b> | <b>Intervention<br/>(n=    )</b> | <b>Control<br/>(n=    )</b> | <b>Between group difference<br/>(statistically significant)</b> |
| <b>Age</b>                      |                            |                                  |                             | <input type="checkbox"/> Yes <input type="checkbox"/> No        |
| <b>Gender</b>                   |                            |                                  |                             | <input type="checkbox"/> Yes <input type="checkbox"/> No        |
| <b>Weight</b>                   |                            |                                  |                             | <input type="checkbox"/> Yes <input type="checkbox"/> No        |
| <b>Height</b>                   |                            |                                  |                             | <input type="checkbox"/> Yes <input type="checkbox"/> No        |
| <b>BMI</b>                      |                            |                                  |                             | <input type="checkbox"/> Yes <input type="checkbox"/> No        |
|                                 |                            |                                  |                             | <input type="checkbox"/> Yes <input type="checkbox"/> No        |

## INTERVENTION

Intervention general description and objectives:

Duration (weeks/months):

| <i>Intervention characteristics</i> |                 |              |                        |           |                              |
|-------------------------------------|-----------------|--------------|------------------------|-----------|------------------------------|
|                                     | Recovery method | Type & Brand | Duration (sets & reps) | Frequency | Attendance / compliance rate |
| Intervention:                       |                 |              |                        |           |                              |
| Control:                            |                 |              |                        |           |                              |

## DATA COLLECTION

| <i>Data collection procedures: PRIMARY OUTCOME</i> |                                  |                                  |         |
|----------------------------------------------------|----------------------------------|----------------------------------|---------|
| Variables                                          | Responsible (who collected data) | Method (scale, instrument, etc.) | Details |
| Physical performance                               |                                  |                                  |         |
|                                                    |                                  |                                  |         |
|                                                    |                                  |                                  |         |
|                                                    |                                  |                                  |         |
|                                                    |                                  |                                  |         |

| <i>Data collection procedures: SECONDARY OUTCOMES</i> |                                  |                                  |         |
|-------------------------------------------------------|----------------------------------|----------------------------------|---------|
| Variables                                             | Responsible (who collected data) | Method (scale, instrument, etc.) | Details |
| Other                                                 |                                  |                                  |         |
| Subjective perception                                 |                                  |                                  |         |
|                                                       |                                  |                                  |         |
| Technical & Tactical                                  |                                  |                                  |         |
|                                                       |                                  |                                  |         |
|                                                       |                                  |                                  |         |
| Physiological                                         |                                  |                                  |         |
|                                                       |                                  |                                  |         |

## RESULTS

| <i>Drop-outs</i> |          |                     |
|------------------|----------|---------------------|
| Group            | Num. (%) | Description/Reasons |
| Intervention     |          |                     |
| Control          |          |                     |

| <i>Results</i>            |          |                  |         |             |
|---------------------------|----------|------------------|---------|-------------|
| <i>Intervention (n= )</i> |          |                  |         |             |
| Variable (and timing)     | Baseline | Post-competition | P-value | Effect size |
|                           |          |                  |         |             |
|                           |          |                  |         |             |
|                           |          |                  |         |             |
|                           |          |                  |         |             |

| <i>Results</i>       |  |
|----------------------|--|
| <i>Control (n= )</i> |  |
|                      |  |

| Variable and timing | Baseline | Post-competition | P-value | Effect size |
|---------------------|----------|------------------|---------|-------------|
|                     |          |                  |         |             |
|                     |          |                  |         |             |
|                     |          |                  |         |             |
|                     |          |                  |         |             |
|                     |          |                  |         |             |

### ADVERSE EVENTS

| <i>Adverse events collection and reporting</i> |                              |                             |                       |
|------------------------------------------------|------------------------------|-----------------------------|-----------------------|
| <b>Registering adverse events</b>              | <input type="checkbox"/> Yes | <input type="checkbox"/> No |                       |
| <b>Results</b>                                 | <b>Total:</b>                | <b>Intervention group:</b>  | <b>Control group:</b> |
| <b>Other descriptions:</b>                     |                              |                             |                       |

### CONCLUSIONS

| <i>Conclusions</i>      |
|-------------------------|
| <b>Primary outcome:</b> |

| <b>COMMENTS</b>                           |
|-------------------------------------------|
| <i>(Add general comments if relevant)</i> |

## METHODS

| Methodological details              |                                                                                                                                                                                                                                                                    | Description / details |
|-------------------------------------|--------------------------------------------------------------------------------------------------------------------------------------------------------------------------------------------------------------------------------------------------------------------|-----------------------|
| Eligibility criteria specified      | <input type="checkbox"/> Yes <input type="checkbox"/> No                                                                                                                                                                                                           |                       |
| Power calculation                   | <input type="checkbox"/> Yes <input type="checkbox"/> No                                                                                                                                                                                                           |                       |
| Method of randomization             | <input type="checkbox"/> Adequate / computer generated<br><input type="checkbox"/> Inadequate<br><input type="checkbox"/> Not reported                                                                                                                             |                       |
| Allocation concealment              | <input type="checkbox"/> Adequate<br><input type="checkbox"/> Doubtful<br><input type="checkbox"/> Inadequate<br><input type="checkbox"/> Not reported                                                                                                             |                       |
| Blinding                            | Participants: <input type="checkbox"/> Yes <input type="checkbox"/> No<br>Coach/es: <input type="checkbox"/> Yes <input type="checkbox"/> No<br>Outcome assessor/s: <input type="checkbox"/> Yes <input type="checkbox"/> No <input type="checkbox"/> Not reported |                       |
| Handling of withdrawals description | <input type="checkbox"/> Yes <input type="checkbox"/> No                                                                                                                                                                                                           |                       |
| Pre-published study protocol        | <input type="checkbox"/> Yes <input type="checkbox"/> No                                                                                                                                                                                                           |                       |

APPENDIX 2:

**RISK OF BIAS ASSESSMENT FORM  
FOR RANDOMISED CONTROLLED TRIALS**

Reviewer:

| First author (year): ( )                                    |                                           | Assessment data:     | Study number: |
|-------------------------------------------------------------|-------------------------------------------|----------------------|---------------|
| Bias domain                                                 | Author's judgment<br>(low, unclear, high) | Support for judgment |               |
| Random sequence generation (selection bias)                 |                                           |                      |               |
| Allocation concealment (selection bias)                     |                                           |                      |               |
| Blinding of participants and researchers (performance bias) |                                           |                      |               |
| Blinding of outcome assessment (detection bias)             |                                           |                      |               |
| Incomplete outcome data (attrition bias)                    |                                           |                      |               |
| Selective reporting (reporting bias)                        |                                           |                      |               |
| Other bias                                                  |                                           |                      |               |
